# Supplementary material for: Enhanced absorption of TiO2nanotubes by N-doping and CdS quantum dots sensitization: insight into the structure
Source: Royal Society of Chemistry journal article supplement (doi:10.1039/c8ra06341a), 2018-01-01
Supplement: c8ra06341a1.pdf [file c8ra06341a1.pdf]

Supplementary Information

## Enhanced absorption of TiO<sub>2</sub> nanotubes by N-doping and CdS quantum dots sensitization: Insight into the structure

Andjelika Bjelajac,<sup>\*</sup> Rada Petrović, Veljko Djokic, Vladimir Matolin, Martin Vondraček, Kassioqe Dembele, Simona Moldovan, Ovidiu Ersen, Gabriel Socol, Ion N. Mihailescu, and Djordje Janačković,

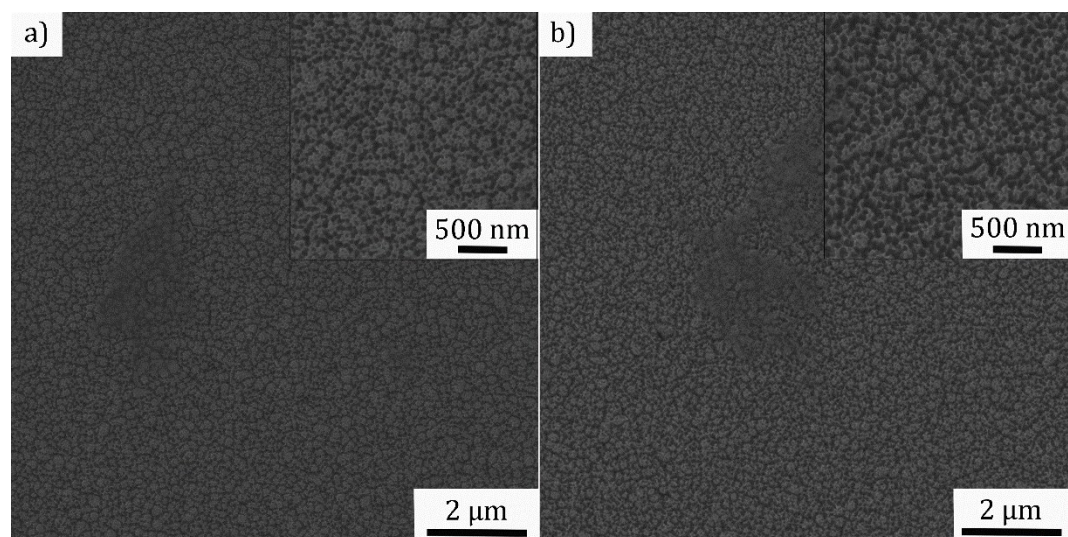

Fig. S1 SEM images of the: a) undoped and b) doped TiO<sub>2</sub> film after 48 h immersion in CdS QDs colloid.

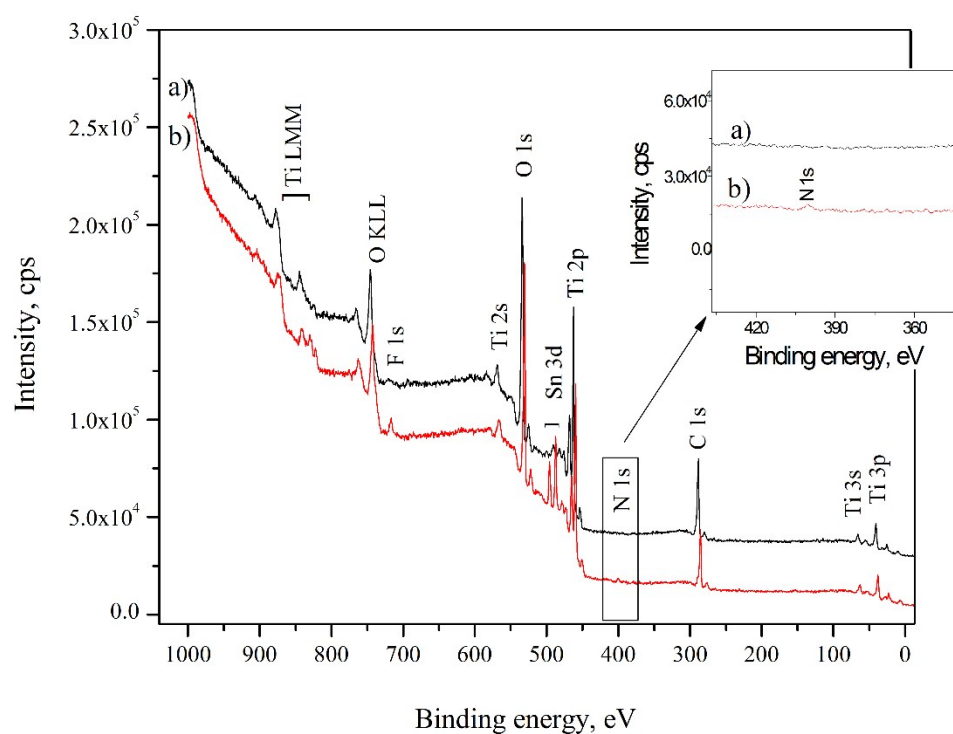

Fig. S2 XPS wide scan spectra of: a) undoped and b) doped sample (measured as received). A zoom, where the N 1s line (around 400 eV) is more visible, is given in the inset.

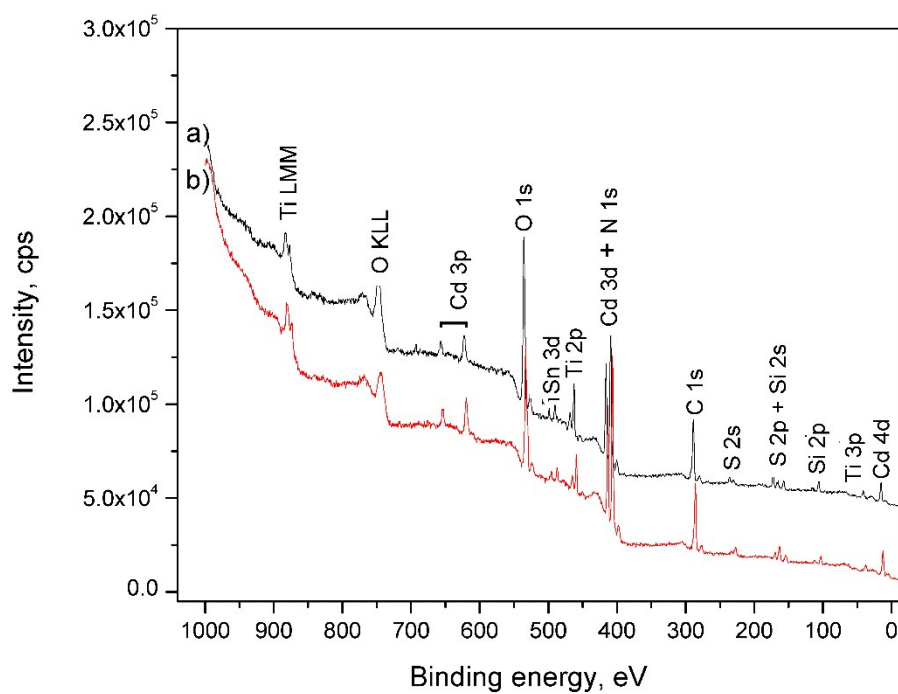

Fig. S3 XPS wide scan spectra of the: a) undoped  $\text{TiO}_2$  film with CdS and b) N-doped  $\text{TiO}_2$  film with CdS.
